# Supplementary material for: Double-shelled support and confined void strategy to improve the lithium storage properties of SnO2/C anode materials for lithium-ion batteries
Source: Royal Society of Chemistry journal article supplement (doi:10.1039/c5ta04421a), 2015-01-01
Supplement: c5ta04421a1.pdf [file c5ta04421a1.pdf]

*Supporting information*

**Double-shelled support and confined void strategy for improving lithium storage properties of SnO<sub>2</sub>/C anode materials for lithium-ion batteries**

Qinghua Tian,<sup>a</sup> Yang Tian,<sup>a</sup> Zhengxi Zhang,<sup>\*a</sup> Li Yang,<sup>\*ab</sup> Shin-ichi Hirano<sup>b</sup>

<sup>a</sup>School of Chemistry and Chemical Engineering, Shanghai Jiao Tong University,

Shanghai 200240, P. R. China

<sup>b</sup>Hirano Institute for Materials Innovation, Shanghai Jiao Tong University, Shanghai

200240,

P. R. China

\*Corresponding author e-mail address: liyangce@sjtu.edu.cn,

zhengxizhang@sjtu.edu.cn (Z.X. Zhang)

Tel: +86 21 54748917, Fax: +86 21 54741297

---

\* Corresponding author. Tel.: +86 21 54748917; fax: +86 21 54741297.  
E-mail address: liyangce@sjtu.edu.cn (L. Yang), zhengxizhang@sjtu.edu.cn (Z.X. Zhang).

Comparing the TEM images of  $\text{SiO}_2@\text{PR}@\text{SiO}_2$  and  $\text{PR}@\text{SnO}_2@\text{PS}$ , it can be clearly seen that  $\text{SnO}_2$  coating, polysaccharides coating and  $\text{SiO}_2$  template removal are achieved simultaneously during hydrothermal treatment.

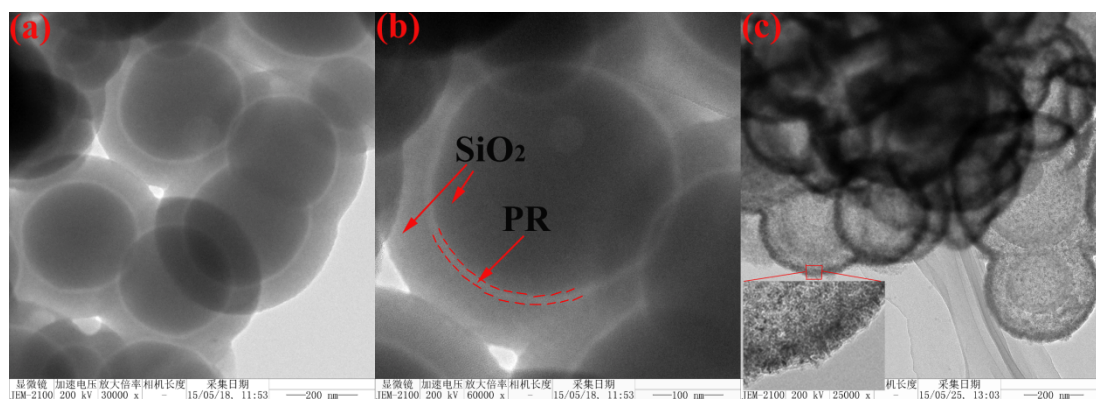

**Figure S1.** TEM images of  $\text{SiO}_2@\text{PR}@\text{SiO}_2$  (a, b) and  $\text{PR}@\text{SnO}_2@\text{PS}$  (c).

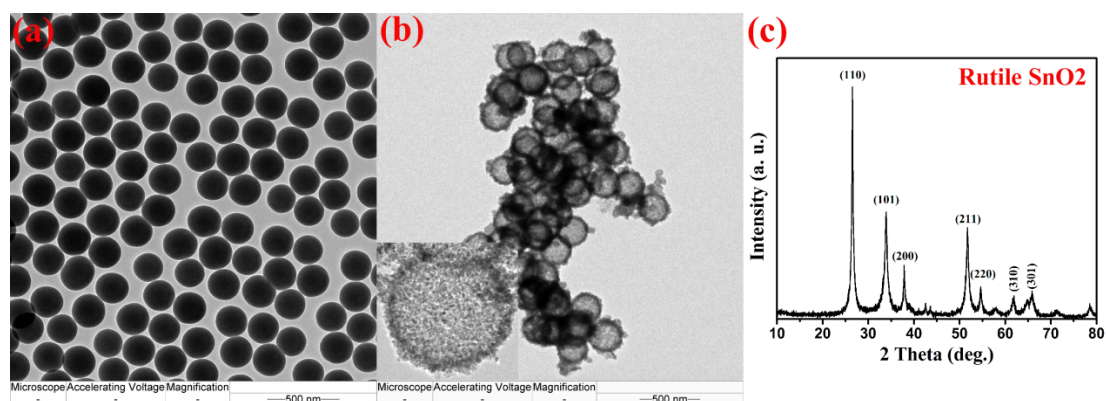

**Figure S2.** TEM images of  $\text{SiO}_2$  templates (a) and  $\text{SnO}_2$  HS (b). XRD patterns of  $\text{SnO}_2$  HS (c)

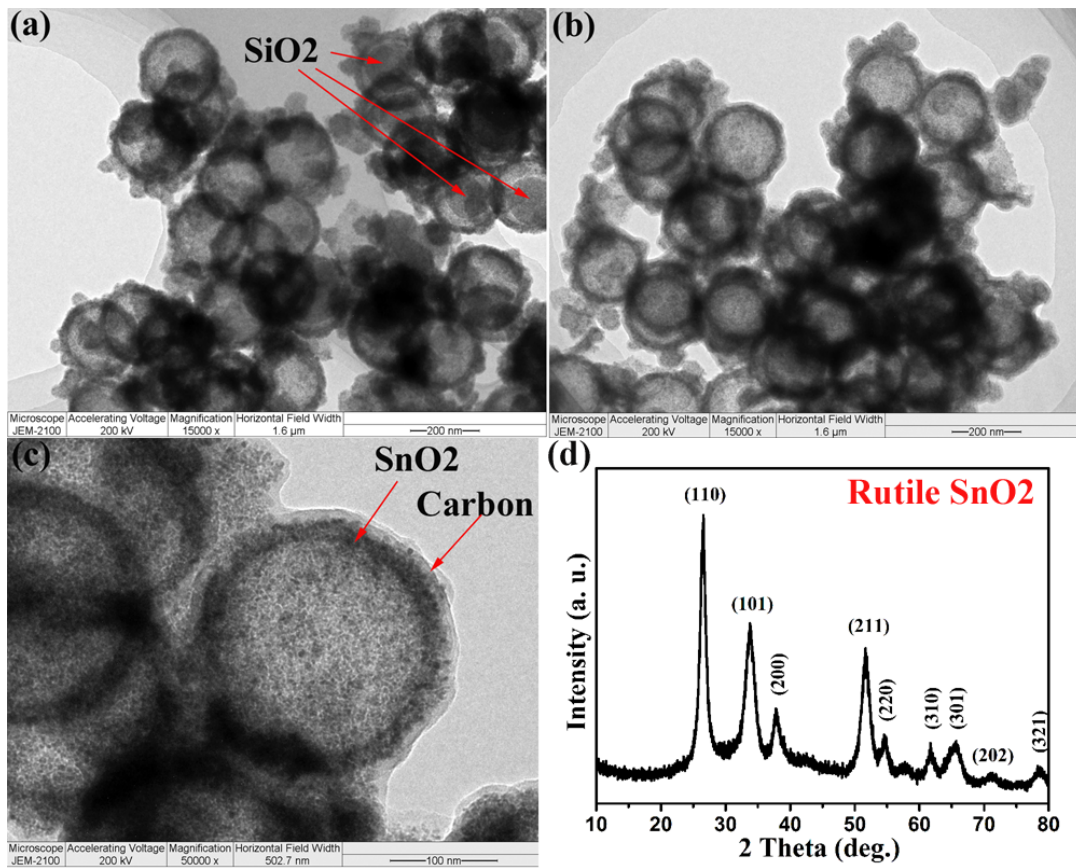

**Figure S3.** TEM images of SnO<sub>2</sub>@SSC-24 (a) and SnO<sub>2</sub>@SSC (hydrothermal treatment for 48 h) (b, c). XRD patterns of SnO<sub>2</sub>@SSC HS (d).

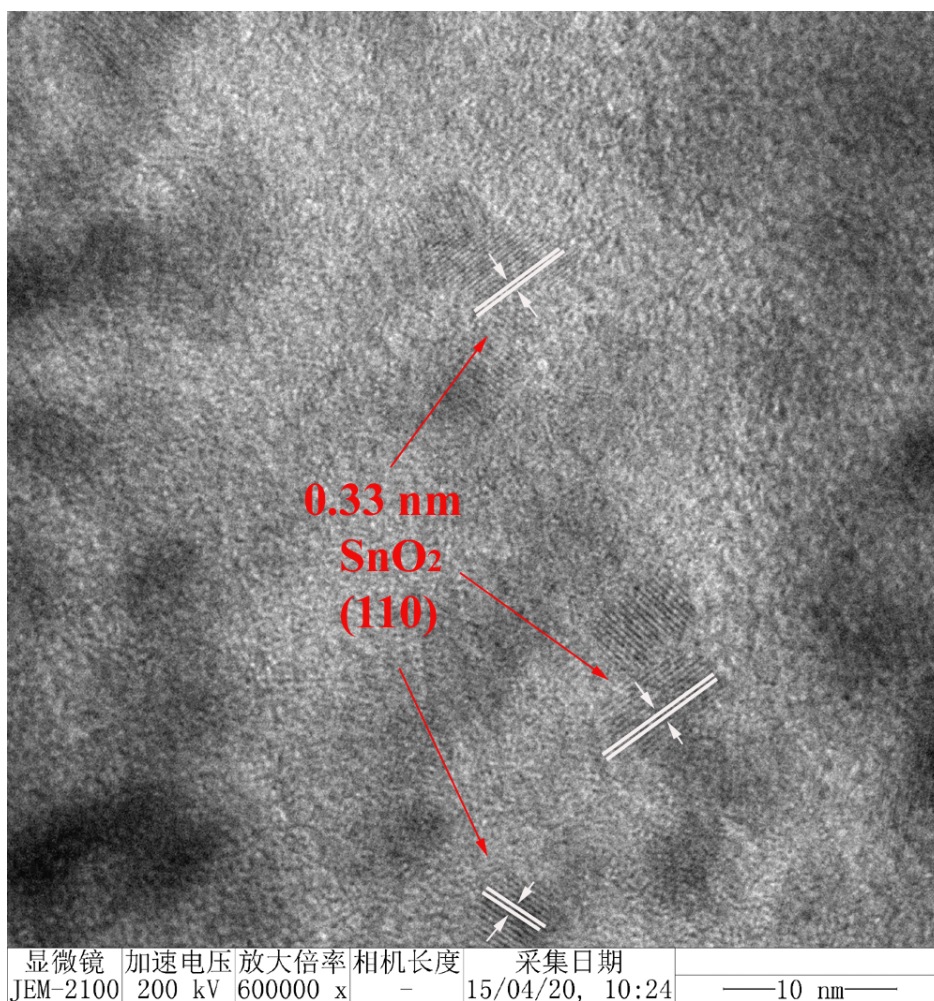

**Figure S4.** The HRTEM image of outer shell of SnO<sub>2</sub>@DSC

**Table S1.** Comparison of our product SnO<sub>2</sub>@DSC with SnO<sub>2</sub>/C-based anode materials reported in other literatures.

| SnO <sub>2</sub> /C-based anode materials      | Potential cutoff (V) | Current density (mA g <sup>-1</sup> ) | Cycles     | Capacity (mAh g <sup>-1</sup> ) | Reference        |
|------------------------------------------------|----------------------|---------------------------------------|------------|---------------------------------|------------------|
| <b>SnO<sub>2</sub>@DSC</b>                     | <b>3-0.01</b>        | <b>200</b>                            | <b>500</b> | <b>838.2</b>                    | <b>This work</b> |
| Sn/SnO <sub>2</sub> /AMCMB                     | 2.2-0                | 100                                   | 50         | 451                             | 1                |
| Double shelled hollow SnO <sub>2</sub> /P      | 2.5-0.01             | 200                                   | 430        | 711.9                           | 2                |
| SnO <sub>2</sub> @OMC                          | 3-0.01               | 100                                   | 60         | 769                             | 3                |
| SnO <sub>2</sub> /CNTs-30                      | 1.5-0.01             | 100                                   | 300        | 430                             | 4                |
| SnO <sub>2</sub> /C-10                         | 2.5-0.01             | 100                                   | 70         | 720                             | 5                |
| SnO <sub>2</sub> @C nanocluster                | 2.5-0.01             | 100                                   | 200        | 1215                            | 6                |
| SnO <sub>2</sub> -HNS/G                        | 3-0.005              | 500                                   | 300        | 696                             | 7                |
| SnO <sub>2</sub> /GAs                          | 3-0.05               | 50                                    | 50         | 760                             | 8                |
| SnO <sub>2</sub> -CMK-5                        | 3-0.01               | 178                                   | 30         | 598                             | 9                |
| Carbon-coated SnO <sub>2</sub> nanotubes       | 2-0.01               | 100                                   | 50         | 400                             | 10               |
| SnO <sub>2</sub> /C                            | 2.5-0.05             | 300                                   | 350        | 653                             | 11               |
| CNTs@SnO <sub>2</sub> @C                       | 2-0.01               | 100                                   | 65         | 462.5                           | 12               |
| SnO <sub>2</sub> HPNFs                         | 3-0.01               | 100                                   | 50         | 583                             | 13               |
| SnO <sub>2</sub> HPNTs                         | 3-0.01               | 100                                   | 50         | 645                             | 13               |
| SWNTS@SnO <sub>2</sub> @PPy                    | 3-0.05               | 150                                   | 100        | 823                             | 14               |
| SnO <sub>2</sub> /Graphene                     | 1.5-0.005            | 100                                   | 20         | 433                             | 15               |
| SnO <sub>2</sub> NSs-graphene                  | 1.2-0.01             | 400                                   | 50         | 518                             | 16               |
| SnO <sub>2</sub> NPs in CNTs                   | 2.5-0.005            | 50                                    | 50         | 560                             | 17               |
| SnO <sub>2</sub> /SWCNHs                       | 3-0.05               | 500                                   | 180        | 530                             | 18               |
| SnO <sub>2</sub> @C nanochains                 | 2-0.005              | 300                                   | 100        | 646                             | 19               |
| SnO <sub>2</sub> /mesoporous carbon            | 2-0.01               | 100                                   | 50         | 473                             | 20               |
| SnO <sub>2</sub> @C yolk-shell                 | 3-0                  | 100                                   | 100        | 630                             | 21               |
| RHC-SnO <sub>2</sub> -C                        | 2-0.05               | 50                                    | 80         | 525                             | 22               |
| Dense SnO <sub>2</sub> /C                      | 3-0                  | 100                                   | 50         | 630                             | 23               |
| SnO <sub>2</sub> on PANI@RGO                   | 3-0.001              | 0.2C                                  | 50         | 573.6                           | 24               |
| SnO <sub>2</sub> nanorods/GS                   | 3-0                  | 300                                   | 50         | 574.6                           | 25               |
| SnO <sub>2</sub> /GNS                          | 2-0.05               | 50                                    | 30         | 570                             | 26               |
| MWCNT/SnO <sub>2</sub>                         | 3-0                  | 156                                   | 100        | 420                             | 27               |
| SnO <sub>2</sub> -80@CMK-5                     | 3-0.005              | 400                                   | 100        | 1004                            | 28               |
| SnO <sub>2</sub> /graphene                     | 2-0.005              | 0.2 C                                 | 100        | 550                             | 29               |
| SnO <sub>2</sub> NSs-array film                | 1.2-0.01             | 391                                   | 50         | 674.9                           | 30               |
| Reduced GO/SnO <sub>2</sub>                    | 3-0.01               | 100                                   | 200        | 718                             | 31               |
| SnO <sub>2</sub> @C/graphene                   | 3-0.01               | 100                                   | 50         | 1015                            | 32               |
| SnO <sub>2</sub> /C hollow spheres             | 2-0.005              | 100                                   | 50         | 473                             | 33               |
| SnO <sub>2</sub> / PEDOT:PSS together with rGO | 3-0.005              | 80                                    | 160        | 980                             | 34               |

## References

- 1 H. Q. Wang, X. H. Zhang, J. B. Wen, Y. G. Huang, F. Y. Lai and Q. Y. Li, *J. Materials Engineering and Performance*, 2015, **24**, 1856.
- 2 M. J. Zhou, Y. C. Liu, J. Chen and Xi. L. Yang, *J. Mater. Chem. A*, **2015**, *3*, 1068.
- 3 X. K. Wang, Z. Q. Li and L. W. Yin, *CrystEngComm*, **2013**, *15*, 7589.
- 4 R. Z. Hu, W. Sun, H. Liu, M. Q. Zeng and M. Zhu, *Nanoscale*, **2013**, *5*, 11971.
- 5 Z. T. Li, G. L. Wu, D. Liu, W. T. Wu, B. Jiang, J. T. Zheng, Y. P. Li, J. H. Li and M. B. Wu, *J. Mater. Chem. A*, **2014**, *2*, 7471.
- 6 M. He, L. X. Yuan, X. L. Hu, a W. X. Zhang, J. Shu and Y. H. Huang, *Nanoscale*, **2013**, *5*, 3298.
- 7 X. S. Zhou, Y. X. Yin, L. J. Wan and Y. G. Guo, *J. Mater. Chem.*, **2012**, *22*, 17456.
- 8 C. Gong, Y. Q. Zhang, M. G. Yao, Y. J. Wei, Q. J. Li, B. Liu, R. Liu, Z. Yao, T. Cui, B. Zou and B. B. Liu, *RSC Adv.*, **2015**, *5*, 39746.
- 9 N. R. Srinivasan, S. Mitra and R. Bandyopadhyaya, *Phys.Chem.Chem.Phys.*, **2014**, *16*, 6630.
- 10 P. Wu, N. Du, H. Zhang, J. X. Yu, Y. Qi and D. R. Yang, *Nanoscale*, **2011**, *3*, 746.
- 11 H. Hu, H. Y. Cheng, G. J. Li, J. P. Liu and Y. Yu, *J. Mater. Chem. A*, **2015**, *3*, 2748.
- 12 P. Wu, N. Du, H. Zhang, J. X. Yu, D. R. Yang, *J. Phys. Chem. C* **2010**, *114*, 22535.
- 13 T. Yang, B. G. Lu, *Phys. Chem. Chem. Phys.* **2014**, *16*, 4115.
- 14 Y. Zhao, J. Li , N. Wang, C. X. Wu, G. F. Dong, L. H. Guan, *J. Phys. Chem. C* **2012**, *116*, 18612.
- 15 J. F. Liang, W. Wei, D. Zhong, Q. L. Yang, L. D. Li, L. Guo, *ACS Appl. Mater.*

*Interfaces* **2012**, *4*, 454.

16 S. J. Ding, D. Y. Luan, F. Y. C. Boey, J. S. Chen, X. W. Lou, *Chem. Commun.* **2011**, *4*, 7155.

17 X. Liu, M. H. Wu, M. R. Li, X. L. Pan, J. Chen, X. H. Bao, *J. Mater. Chem. A* **2013**, *1*, 9527.

18 Y. Zhao, J. Li, Y. Ding, L Guan, *RSC Adv.* **2011**, *1*, 852.

19 X. Y. Yu, S. Y. Yang, B. H. Zhang, D. Shao, X. M. Dong, Y. P. Fang, Z. S. Li, H. Q. Wang, *J. Mater. Chem.* **2011**, *21*, 12295.

20 L. Chen, P. Wu, H. Wang, Y. Ye, B. Xu, G. P. Cao, Y. M. Zhou, T. H. Lu, Y. S. Yang, *J. Power Sources* **2014**, *247*, 178.

21 J. X. Wang, W. Li, F. Wang, Y. Y. Xia, A. M. Asirib, D. Y. Zhao, *Nanoscale* **2014**, *6*, 3217.

22 Y. Li, S. M. Zhu, Q. L. Liu, J. J. Gu, Z. P. Guo, Z. X. Chen, C. L. Feng, D. Zhang, W. J. Moon, *J. Mater. Chem.* **2012**, *22*, 2766.

23 J. Liu, W. Li, A. Manthiram, *Chem. Commun.* **2010**, *46*, 1437.

24 R. L. Liang, H. Q. Cao, D. Qian, J. X. Zhang, M. Z. Qu, *J. Mater. Chem.* **2011**, *21*, 17654.

25 C. H. Xu, J. Sun, L. Gao, *J. Mater. Chem.* **2012**, *22*, 975.

26 S. M. Paek, E. J. Yoo, I. Honma, *Nano Lett.* **2009**, *9*, 72.

27 Y. H. Jin, K. M. Min, S. D. Seo, H. W. Shim, D. W. Kim, *J. Phys. Chem. C* **2011**, *115*, 22062.

28 F. Han, W. C. Li, M. R. Li, A. H. Lu, *J. Mater. Chem.* **2012**, *22*, 9645.

- 29 M. Zhang, D. N. Lei, Z. F. Du, X. M. Yin, L. B. Chen, Q. H. Li, Y. G. Wang, T. H. Wang, *J. Mater. Chem.* **2011**, *21*, 1673.
- 30 X. Y. Zhao, B. Liu, C. W. Hu, M. H. Cao, *Chem. Eur. J.* **2013**, *19*, 1.
- 31 X. W. Guo, X. P. Fang, Y. Sun, L. Y. Shen, Z. X. Wang, L. Q. Chen, *J. Power Sources* **2013**, *226*, 75.
- 32 P. C. Lian, J. Y. Wang, D. D. Cai, L. X. Ding, Q. M. Jia, H. H. Wang, *Electrochim. Acta* **2014**, *116*, 103.
- 33 X. W. Lou, D. Deng, J. Y. Lee, L. A. Archer, *Chem. Mater.* **2008**, *20*, 6562.
- 34 M. S. A. S. Shah, S. Muhammad, J. H. Park, W. S. Yoon and P. J. Yoo, *RSC Adv.*, **2015**, *5*, 13964.
